# Supplementary material for: Post-enrichment of nitrogen in soft-templated ordered mesoporous carbon materials for highly efficient phenol removal and CO2 capture
Source: Royal Society of Chemistry journal article supplement (doi:10.1039/c2jm16183d), 2012-01-01
Supplement: c2jm16183d.pdf [file c2jm16183d.pdf]

## Electronic Supplementary Information for

### Post Nitrogen Enrichment of Soft-Templated Ordered Mesoporous Carbon Materials for Highly Efficient Phenol Removal and CO<sub>2</sub> Capture

Zhangxiong Wu,<sup>a,b</sup> Paul A Webley,<sup>\*a</sup> and Dongyuan Zhao<sup>\*a,b</sup>

<sup>a</sup> Department of Chemical Engineering, Faculty of Engineering, Monash University,  
Melbourne 3800, Australia. E-mail: [paul.webley@monash.edu](mailto:paul.webley@monash.edu)

<sup>b</sup> Department of Chemistry and Advanced Materials Laboratory, Fudan University, Shanghai  
200438, P. R. China. Fax: +86-21-51630307; Tel: +86-21-51630205; E-mail:  
[dyzhao@fudan.edu.cn](mailto:dyzhao@fudan.edu.cn)

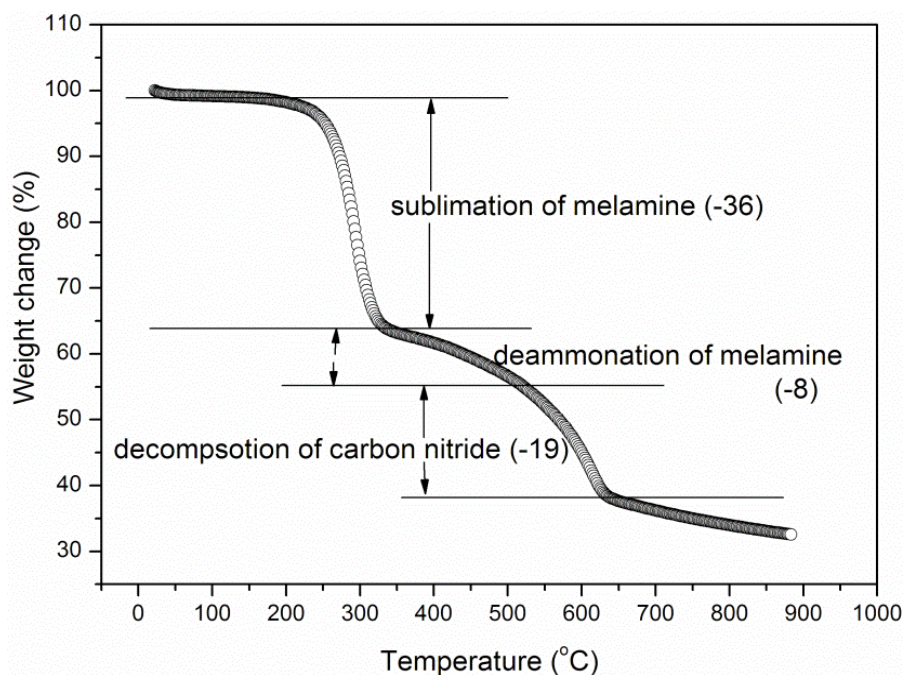

**Fig. S1** Details of the TG curve of the as-prepared pristine mesoporous carbon and melamine composite with a mass ratio of ~ 1: 1.5.

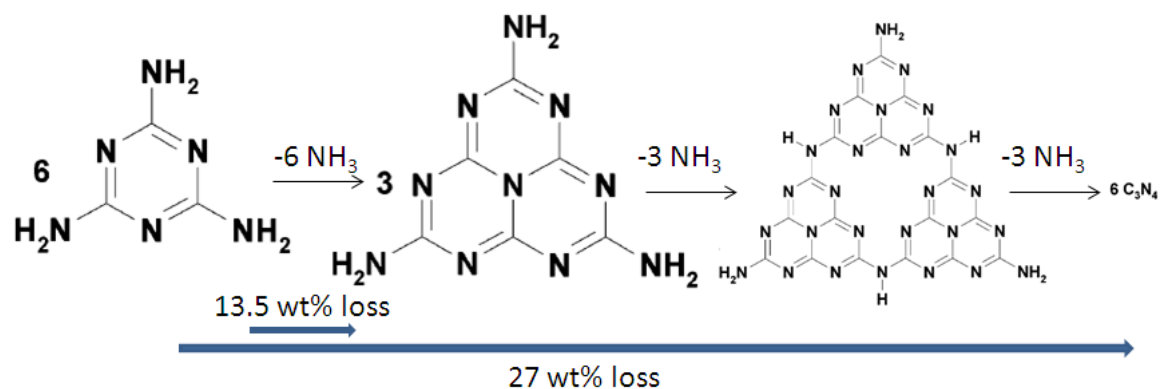

**Fig. S2** Condensation pathways of melamine to carbon nitride (adapted from Ref. S1)

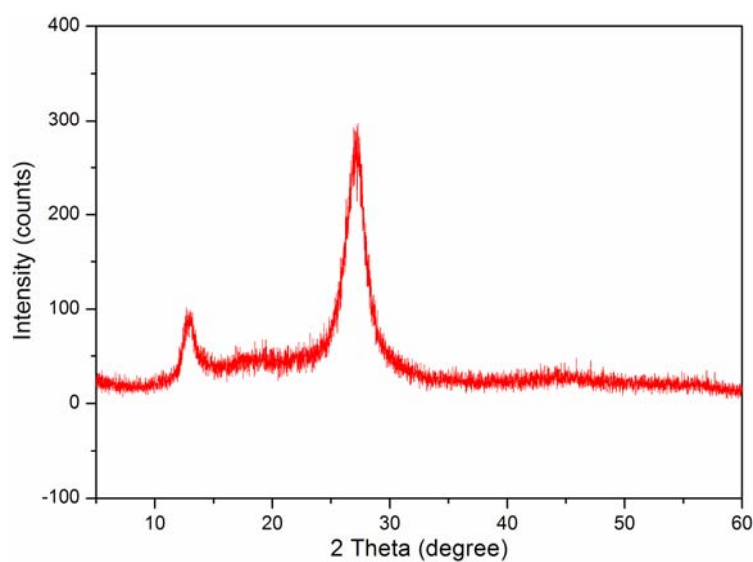

**Fig. S3** Wide-angle XRD pattern of the carbon nitride product obtained by heating melamine to 500 °C and keeping isothermal for 1 h (the identical experimental conditions as those for the preparation of N-OMC-500)

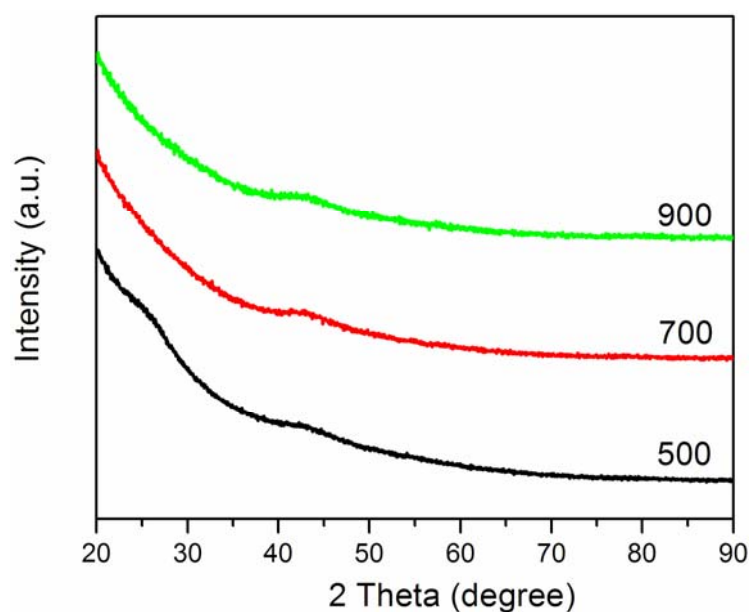

**Fig. S4** Wide-angle XRD patterns of the ordered mesoporous nitrogen-containing carbon N-OMC-T obtained by calcining the melamine/carbon composite at 500 ~ 900 °C.

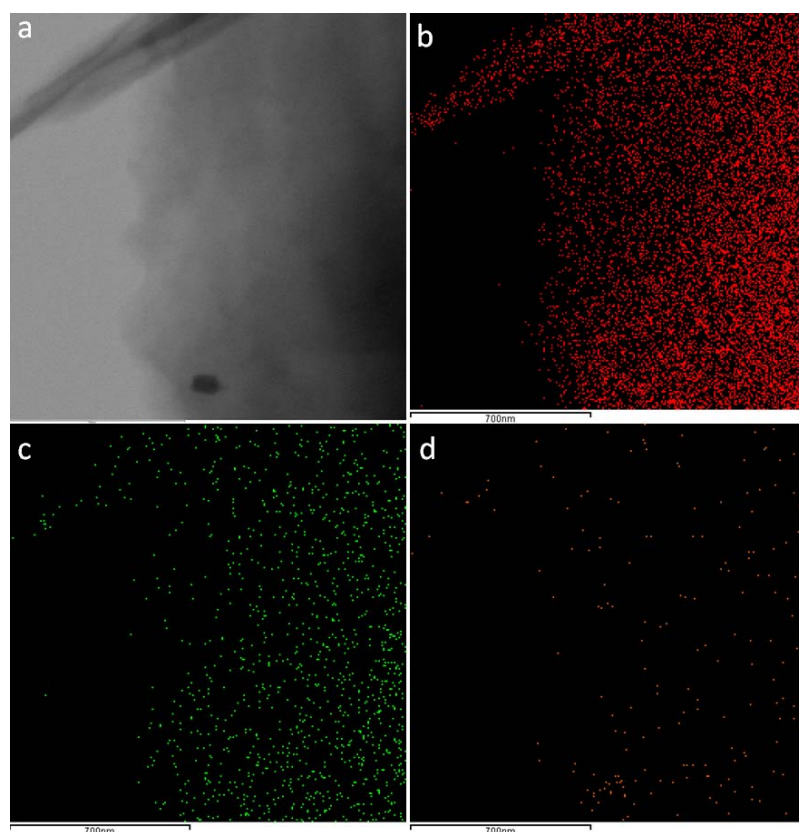

**Fig. S5** The DF-STEM image (a) and the corresponding C (b), N (c) and O (d) elemental maps of the ordered mesoporous nitrogen-containing carbon N-OMC-700.

### Supporting references

S1. B. Jürgens, E. Irran, J. Senker, P. Kroll, H. Müller, and W. Schnick, *J. Am. Chem. Soc.* 2003, **125**, 10288.
